# Supplementary material
Source: PubMed Central journal article supplement (PMC8685289)
Supplement: mmc1.pdf [file mmc1.pdf]

Online Appendix for  
Conditional Cash Lotteries Increase  
COVID-19 Vaccination Rates

Andrew Barber<sup>a</sup>    Jeremy West<sup>a\*</sup>

<sup>a</sup>University of California, Santa Cruz

Manuscript accepted December 2021 at the  
*Journal of Health Economics*

---

\*Barber: [abarber1@ucsc.edu](mailto:abarber1@ucsc.edu). West (corresponding author): [westj@ucsc.edu](mailto:westj@ucsc.edu).

# A Appendix tables and figures

Table A1: State COVID-19 vaccination initiatives using conditional cash lottery incentives

| Announcement date (in 2021) | State          | Program name         | Eligible vaccinations | Registration process | Largest prize (\$) | Total prize value (approximate \$) | Exclusive prizes | Drawing frequency |
|-----------------------------|----------------|----------------------|-----------------------|----------------------|--------------------|------------------------------------|------------------|-------------------|
| May 12                      | Ohio           | Vax-A-Million        | All                   | Opt-in               | 1,000,000          | 5,600,000                          | Yes              | Weekly            |
| May 20                      | Maryland       | VaxCash              | All                   | Auto                 | 400,000            | 2,000,000                          | Yes              | Daily             |
| May 20                      | New York       | Vax And Scratch      | New                   | Opt-in               | 5,000,000          | Unknown                            | No               | Instant           |
| May 21                      | Oregon         | Take Your Shot       | All                   | Auto                 | 1,000,000          | 1,500,000                          | Yes              | Once              |
| May 24                      | Delaware       | DEWins               | New/All               | Auto                 | 302,000            | 5,000,000                          | Yes              | Semi-weekly       |
| May 25                      | Arkansas       | Not named            | New                   | Opt-in               | 1,000,000          | 2,000,000                          | No               | Instant           |
| May 25                      | Colorado       | Comeback Cash        | All                   | Auto                 | 1,000,000          | 6,250,000                          | Yes              | Weekly            |
| May 27                      | California     | Vax For The Win      | New/All               | Auto/Opt-in          | 1,500,000          | 116,500,000                        | Yes              | Weekly            |
| May 27                      | West Virginia  | Do It For Babydog    | All                   | Opt-in               | 1,588,000          | 10,000,000                         | Yes              | Weekly            |
| June 01                     | New Mexico     | Vax 2 The Max        | All                   | Opt-in               | 5,000,000          | 10,000,000                         | Yes              | Weekly            |
| June 03                     | Washington     | Shot Of A Lifetime   | All                   | Auto                 | 1,000,000          | 2,400,000                          | Yes              | Weekly            |
| June 04                     | Kentucky       | Shot At A Million    | All                   | Opt-in               | 1,000,000          | 4,200,000                          | Yes              | Monthly           |
| June 10                     | North Carolina | Summer Cash          | New/All               | Auto                 | 1,000,000          | 4,500,000                          | Yes              | Bi-weekly         |
| June 15                     | Massachusetts  | VaxMillions          | All                   | Opt-in               | 1,000,000          | 5,500,000                          | Yes              | Weekly            |
| June 17                     | Illinois       | All In For The Win   | All                   | Auto                 | 1,000,000          | 10,000,000                         | Yes              | Weekly            |
| June 17                     | Louisiana      | Shot At A Million    | All                   | Opt-in               | 1,000,000          | 2,300,000                          | Yes              | Weekly            |
| June 17                     | Maine          | Don't Miss Your Shot | All                   | Opt-in               | 896,809            | 896,809                            | Yes              | Once              |
| June 18                     | Nevada         | Vax Nevada Days      | All                   | Auto                 | 1,000,000          | 5,000,000                          | Yes              | Weekly            |
| July 01                     | Michigan       | Shot To Win          | All                   | Opt-in               | 2,000,000          | 5,495,000                          | Yes              | Bi-weekly         |
| July 21                     | Missouri       | MO VIP               | All                   | Opt-in               | 10,000             | 9,000,000                          | Yes              | Bi-weekly         |

Notes: Table A1 lists all state-run conditional cash lottery incentive schemes for COVID-19 vaccinations in the United States. Ohio's Vax-A-Million incentive program was the first and was announced on May 12, 2021 and lottery entry ended on June 20, 2021. The eligible vaccinations column indicates whether people who were vaccinated prior to the program's announcement could win prizes in the CCL. The registration process column indicates whether any action is required to be considered for prizes (typically filling out a form on the state's website). The total prize value column includes monetary and nonmonetary prizes, such as college tuition scholarships. The exclusive prizes column indicates whether the CCL prizes are exclusively available to vaccinated individuals, compared to non-exclusive prizes like free scratch-off tickets for state lotteries.

Table A2: State unit weights for the ridge augmented synthetic control models

| State                | Unit weights for model |        |          |
|----------------------|------------------------|--------|----------|
|                      | Vaccinations           | Cases  | ICU days |
| Alabama              | -0.065                 | -0.000 | -0.000   |
| Alaska               | -0.021                 | -0.000 | -0.000   |
| Arizona              | 0.008                  | -0.000 | -0.000   |
| Connecticut          | -0.058                 | -0.000 | 0.000    |
| District of Columbia | 0.009                  | 0.000  | -0.000   |
| Florida              | -0.067                 | -0.000 | -0.000   |
| Georgia              | 0.107                  | -0.000 | 0.000    |
| Hawaii               | -0.045                 | -0.000 | -0.001   |
| Idaho                | 0.181                  | 0.000  | 0.000    |
| Indiana              | 0.001                  | 0.136  | 0.419    |
| Iowa                 | -0.066                 | 0.000  | 0.000    |
| Kansas               | 0.281                  | 0.304  | 0.082    |
| Michigan             | 0.191                  | 0.033  | 0.078    |
| Minnesota            | 0.015                  | 0.000  | 0.000    |
| Mississippi          | 0.040                  | -0.000 | -0.000   |
| Missouri             | -0.038                 | 0.000  | 0.197    |
| Montana              | -0.119                 | -0.000 | -0.000   |
| Nebraska             | 0.115                  | 0.000  | 0.000    |
| New Hampshire        | -0.044                 | 0.000  | -0.000   |
| New Jersey           | 0.079                  | -0.000 | 0.060    |
| North Dakota         | 0.126                  | 0.000  | 0.000    |
| Oklahoma             | -0.007                 | 0.000  | 0.000    |
| Pennsylvania         | -0.057                 | 0.000  | 0.000    |
| Rhode Island         | 0.024                  | 0.109  | 0.165    |
| South Carolina       | 0.043                  | -0.000 | -0.000   |
| South Dakota         | -0.024                 | -0.000 | 0.000    |
| Tennessee            | 0.049                  | 0.000  | 0.000    |
| Texas                | -0.056                 | -0.000 | 0.000    |
| Utah                 | 0.091                  | 0.141  | 0.000    |
| Vermont              | 0.026                  | -0.000 | -0.000   |
| Virginia             | 0.031                  | 0.000  | 0.000    |
| Wisconsin            | 0.321                  | 0.277  | 0.000    |
| Wyoming              | -0.067                 | -0.000 | -0.000   |

Notes: States not listed are not in the donor pool. For outcomes in column titles:  
Vaccinations = Share of population with any COVID-19 vaccination (at least a first dose).  
Cases = Cumulative total COVID-19 cases recorded per 100,000 population.  
ICU days = Cumulative total COVID-19 hospital ICU patient-days per 100,000 population.

Figure A1: Share of population 18-older with any COVID-19 vaccination over time

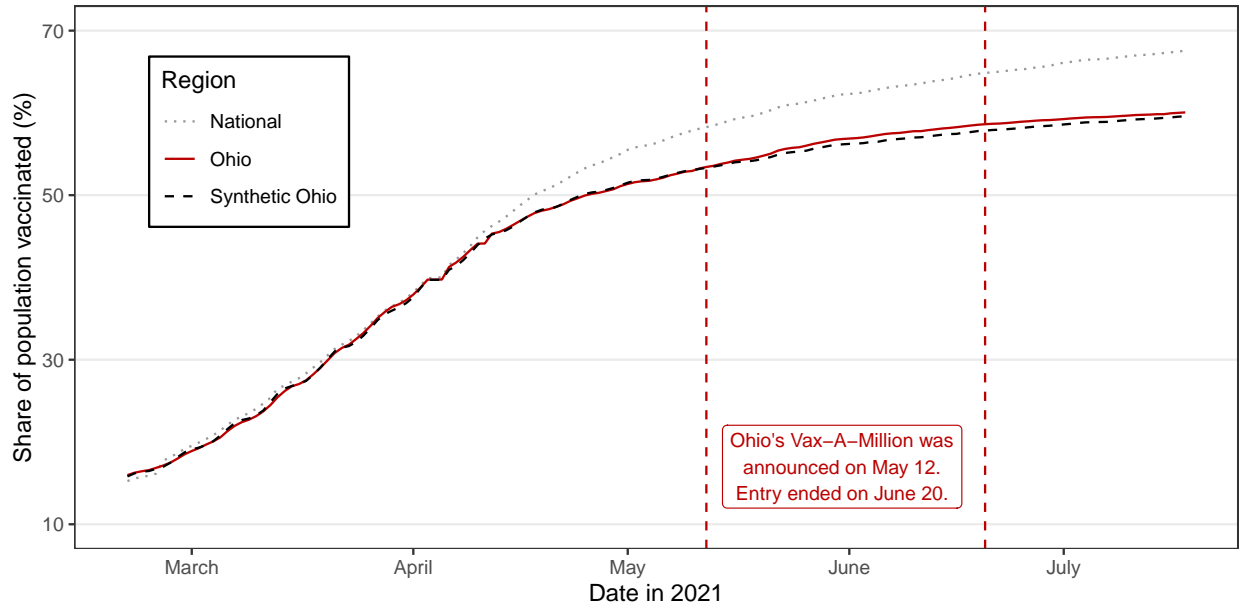

(a) Time series plotted by region

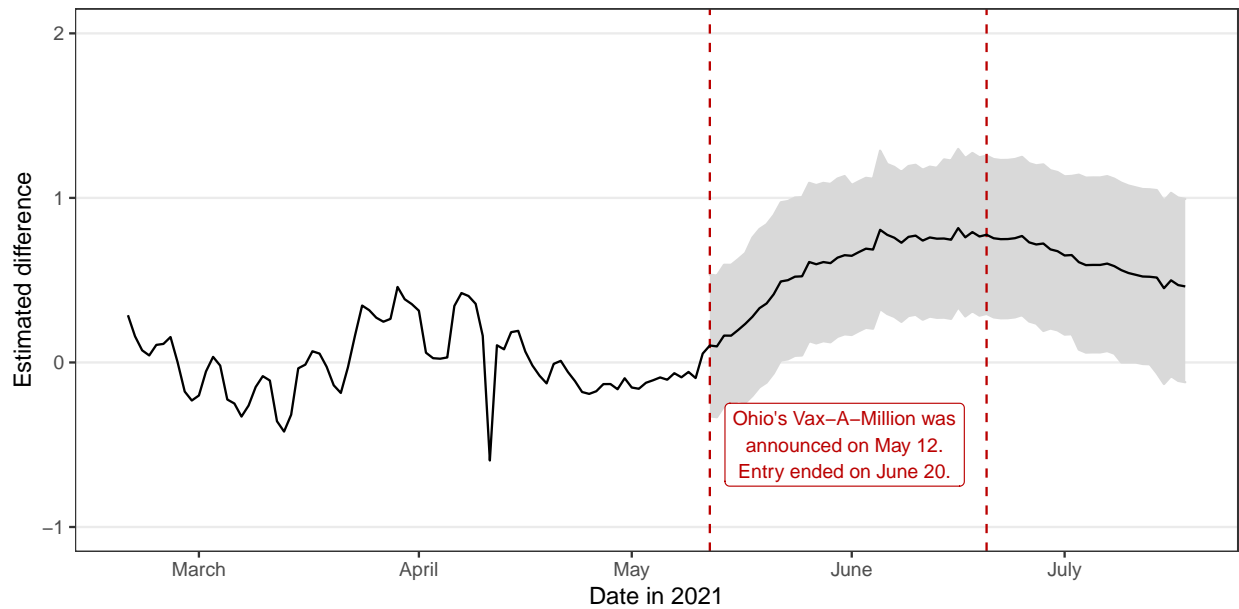

(b) Estimated difference between Ohio and Synthetic Ohio

Notes: Panel (a) of Figure A1 shows time series graphs for the share of population of age 18 or older that had received at least a first dose of any COVID-19 vaccination by region and date. Panel (b) shows the estimated difference between Ohio and the synthetic control. The grey shading indicates 95 percent confidence intervals for each post-treatment date, calculated using conformal inference.

Figure A2: Estimated effects for transformations of each outcome into a common scale

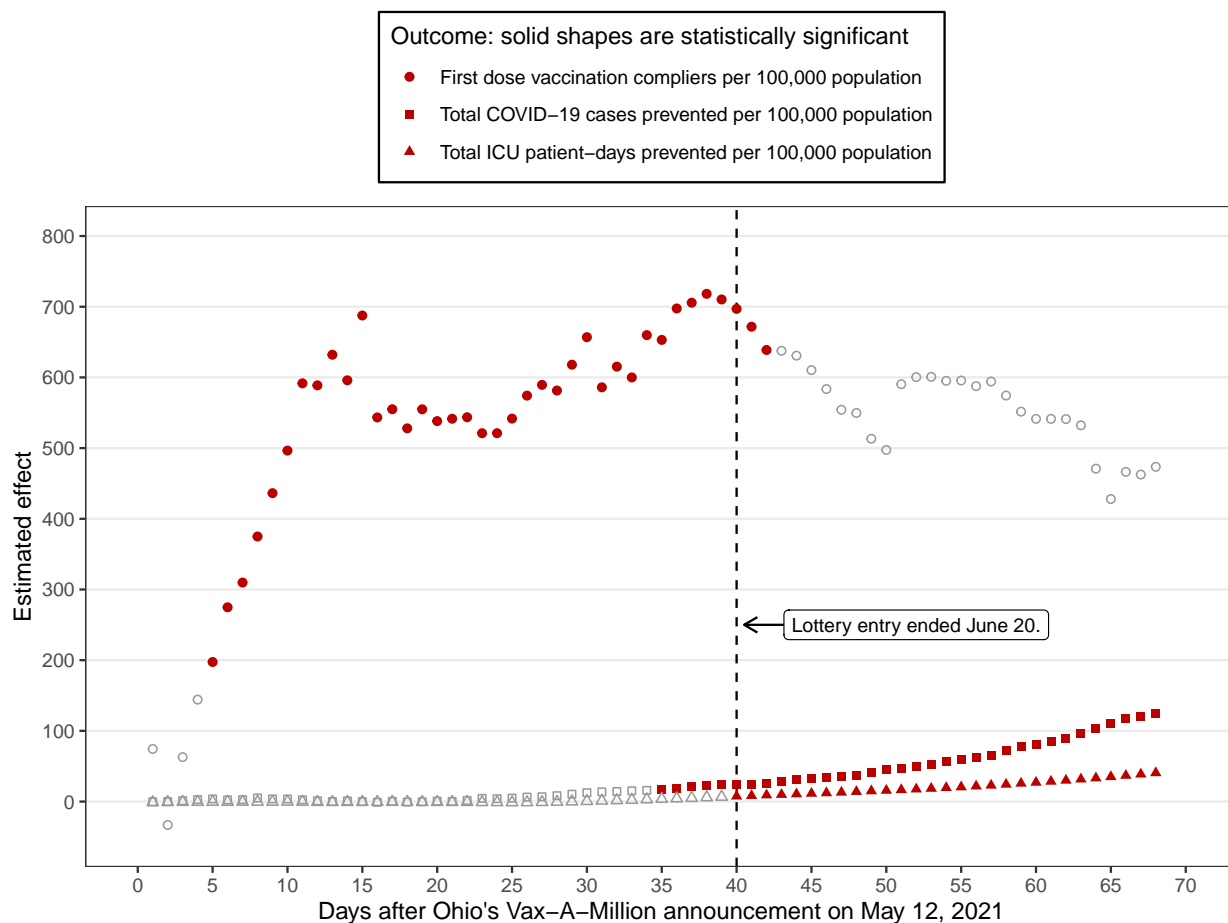

Notes: Figure A2 shows estimated differences between Ohio and the synthetic control for the three outcomes examined in this study, transformed to use a common scale. These transformations are: (1) The fraction of population with any COVID-19 vaccination – multiplied by 100,000. (2) The cumulative total COVID-19 cases recorded per 100,000 population – multiplied by negative one. (3) The cumulative total COVID-19 ICU patient-days per 100,000 population – multiplied by negative one. These effects are plotted by day following Ohio's Vax-A-Million lottery announcement. The shapes are solid if the 95 percent confidence interval does not overlap with zero, as calculated using conformal inference.

Figure A3: Robustness checks of the synthetic control estimates for the cumulative total COVID-19 cases recorded per 100,000 population, using different samples and specifications

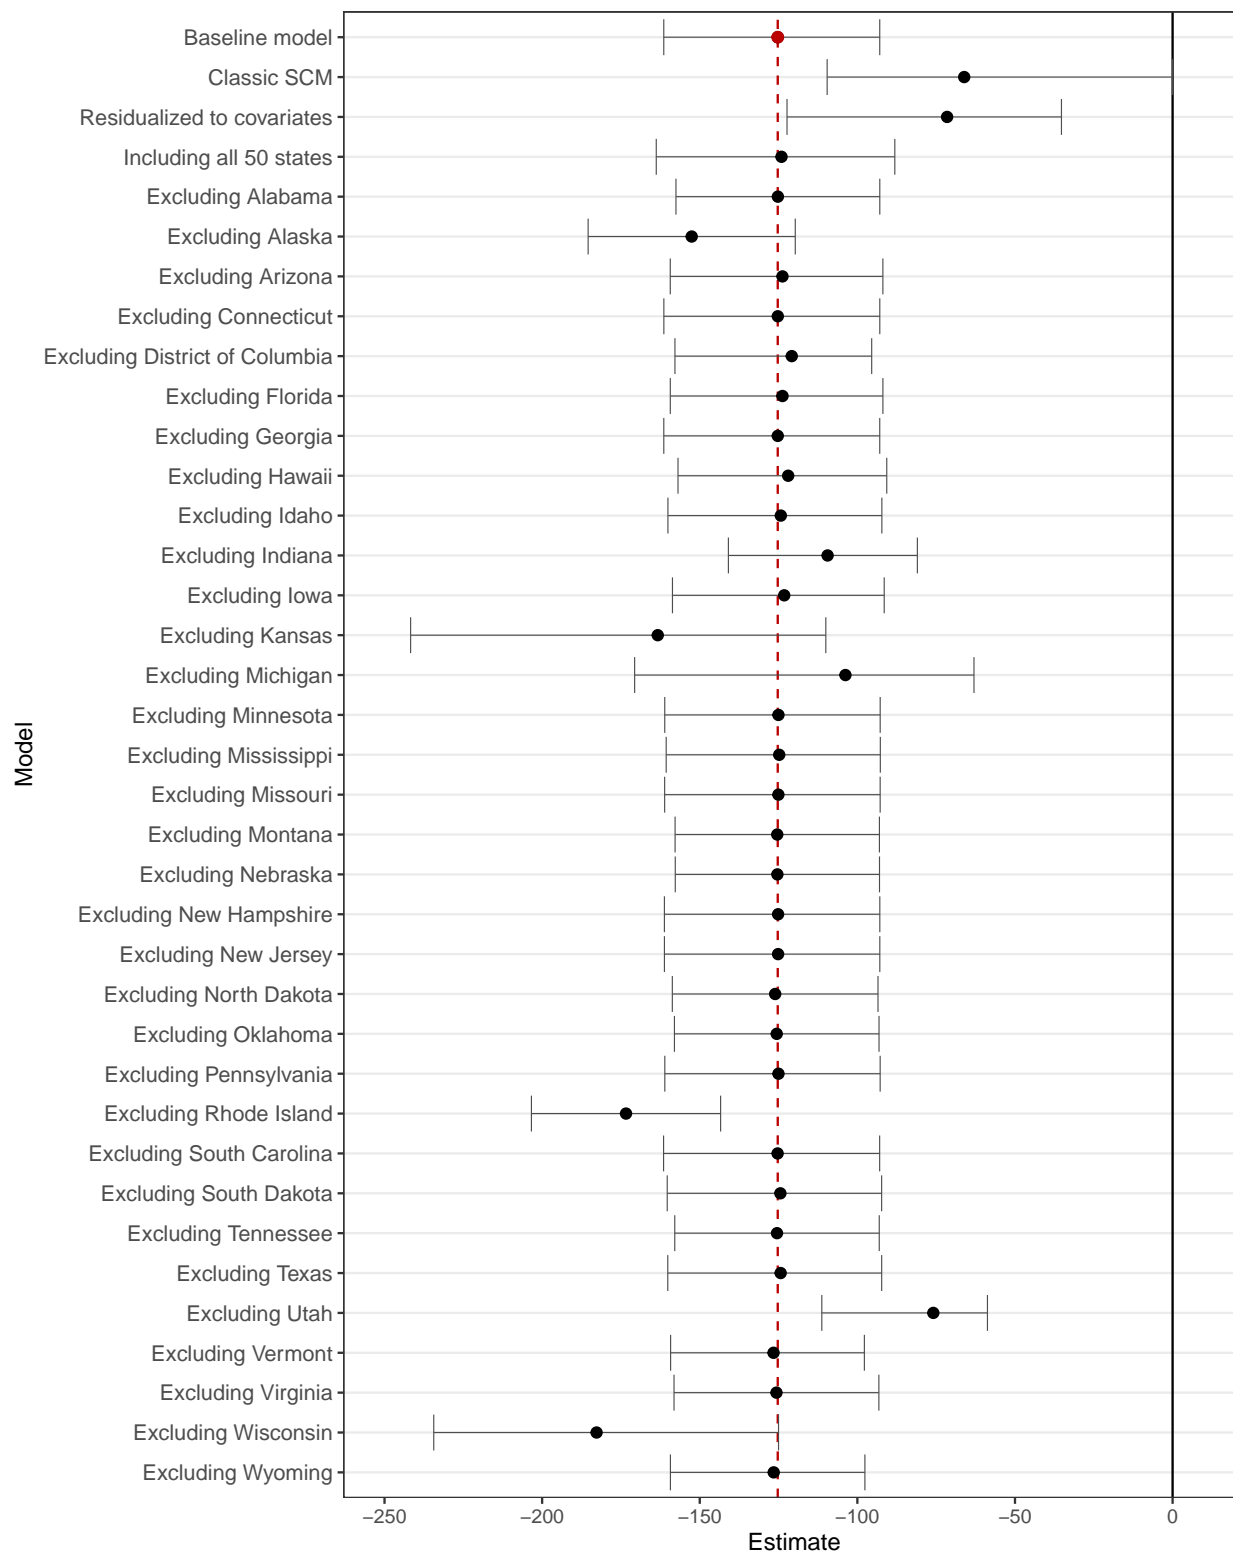

Notes: Figure A3 shows estimated differences between Ohio and the synthetic control for the cumulative total COVID-19 cases recorded per 100,000 population by July 18, 2021. Each row depicts results from a separate model using the data sample and/or specification denoted. The grey error bars indicate the respective 95 percent confidence intervals, which are calculated using conformal inference.

Figure A4: Robustness checks of the synthetic control estimates for the total COVID-19 ICU patient-days per 100,000 population, using different samples and specifications

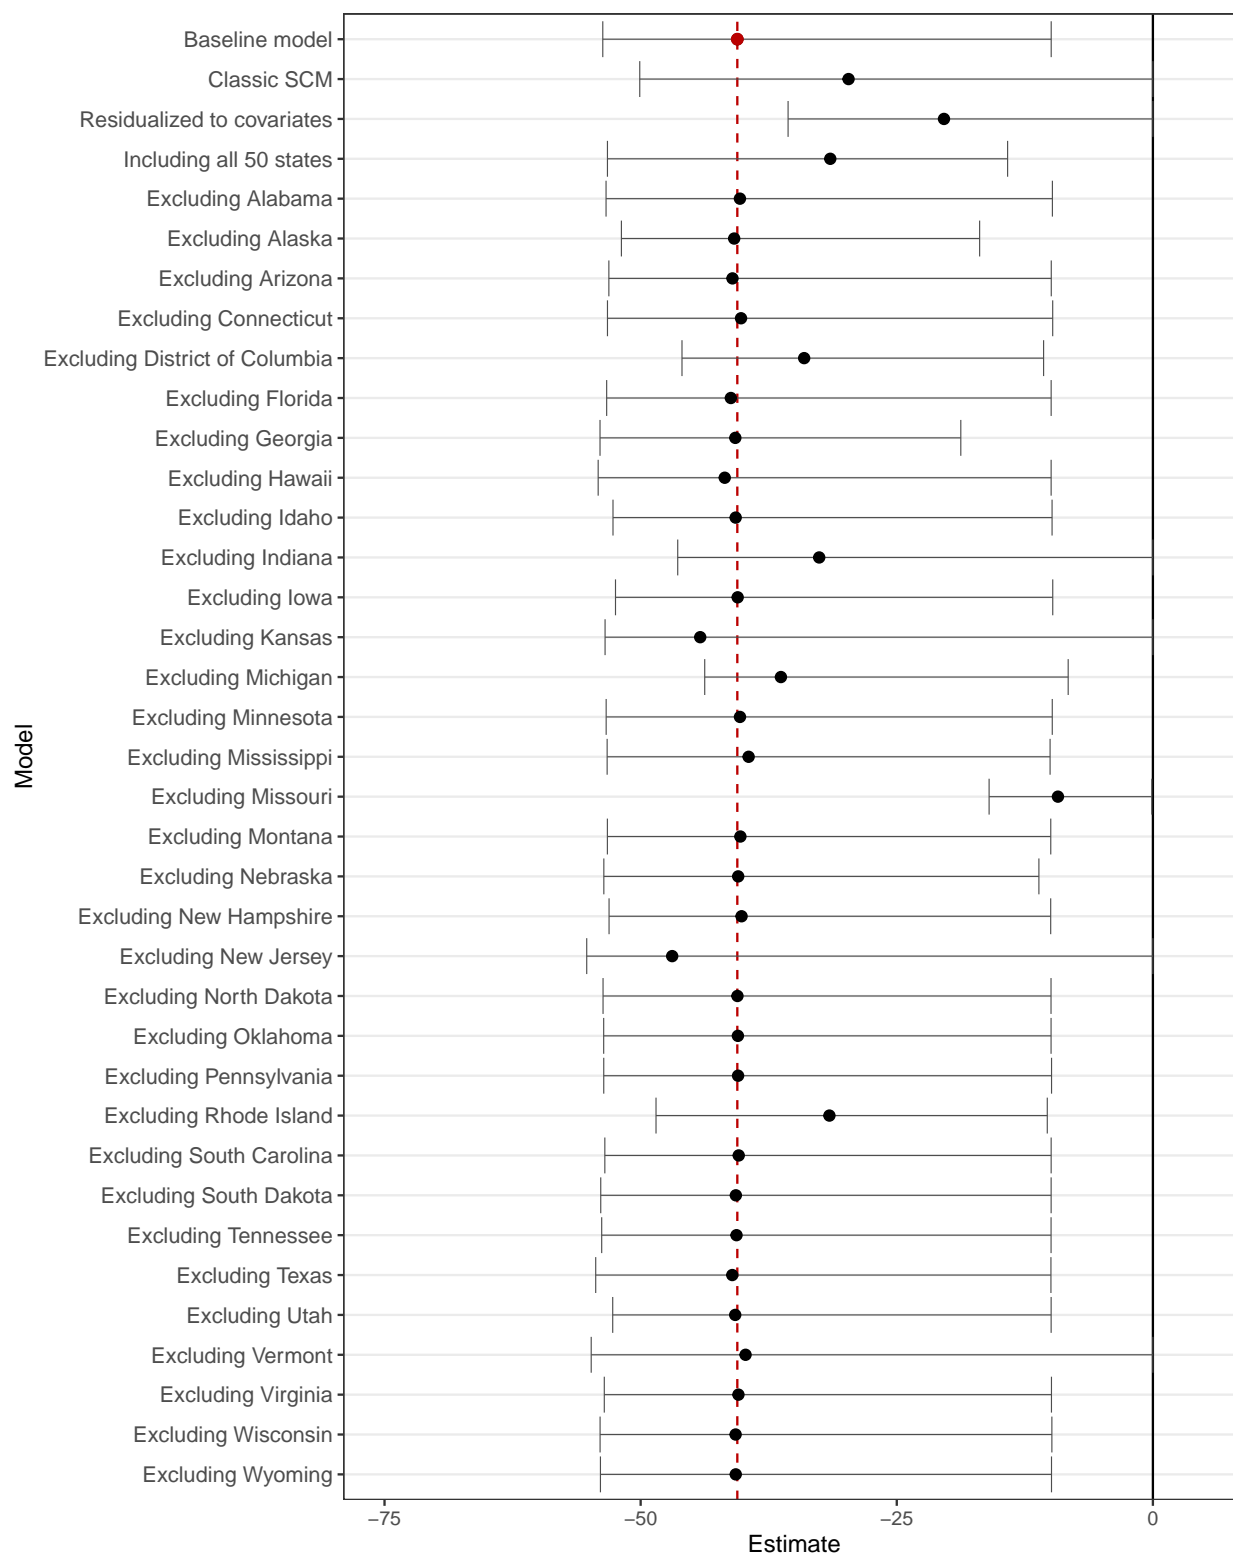

Notes: Figure A4 shows estimated differences between Ohio and the synthetic control for the cumulative total COVID-19 ICU patient-days per 100,000 population by July 18, 2021. Each row depicts results from a separate model using the data sample and/or specification denoted. The grey error bars indicate the respective 95 percent confidence intervals, which are calculated using conformal inference.

Figure A5: Synthetic control placebo effects and rankings for other states

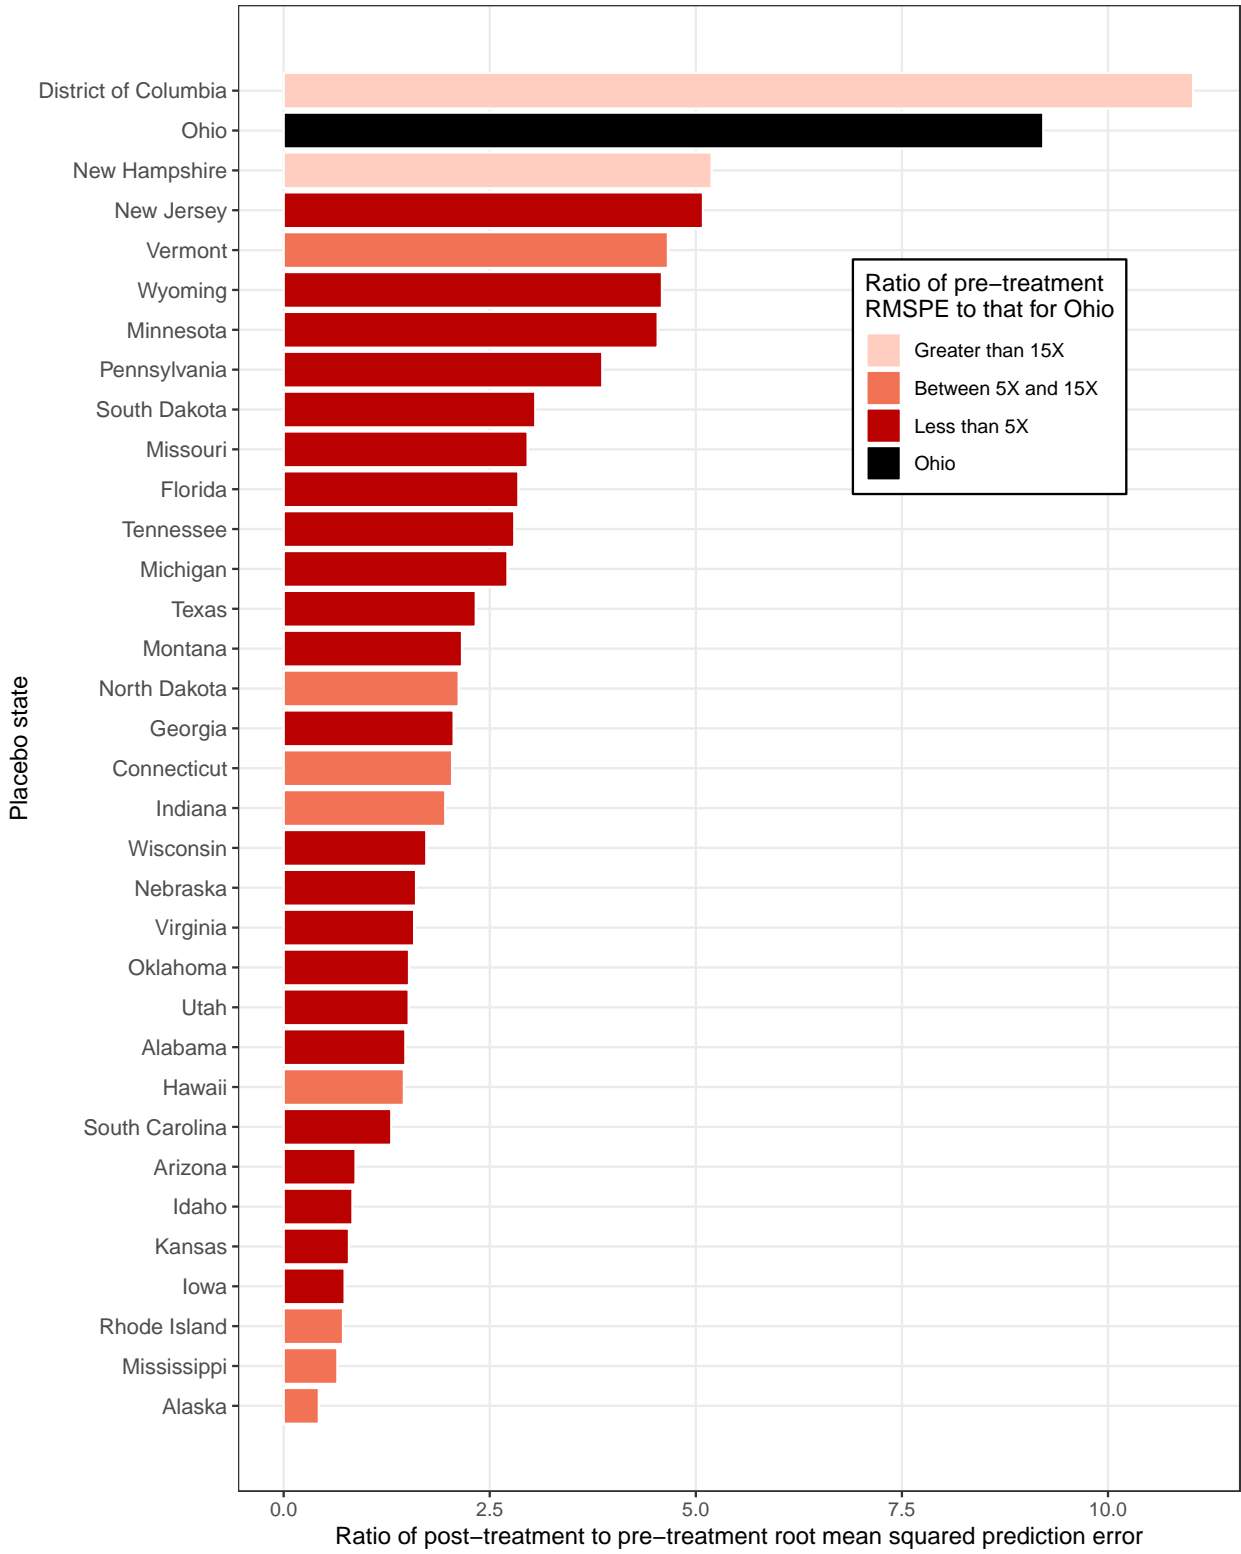

Notes: States not listed are not in the donor pool. The outcome is the share of population with any COVID-19 vaccination (at least a first dose). Post-treatment RMSPE are computed using the full treatment period, starting with Ohio’s Vax-A-Million announcement on May 12, 2021 and ending with the lottery entry end-date on June 20, 2021. Pre-treatment RMSPE are computed using the full pre-treatment period in the data, starting on February 19, 2021 and ending on May 11, 2021.



Figure A6: Synthetic control placebo estimates for other states

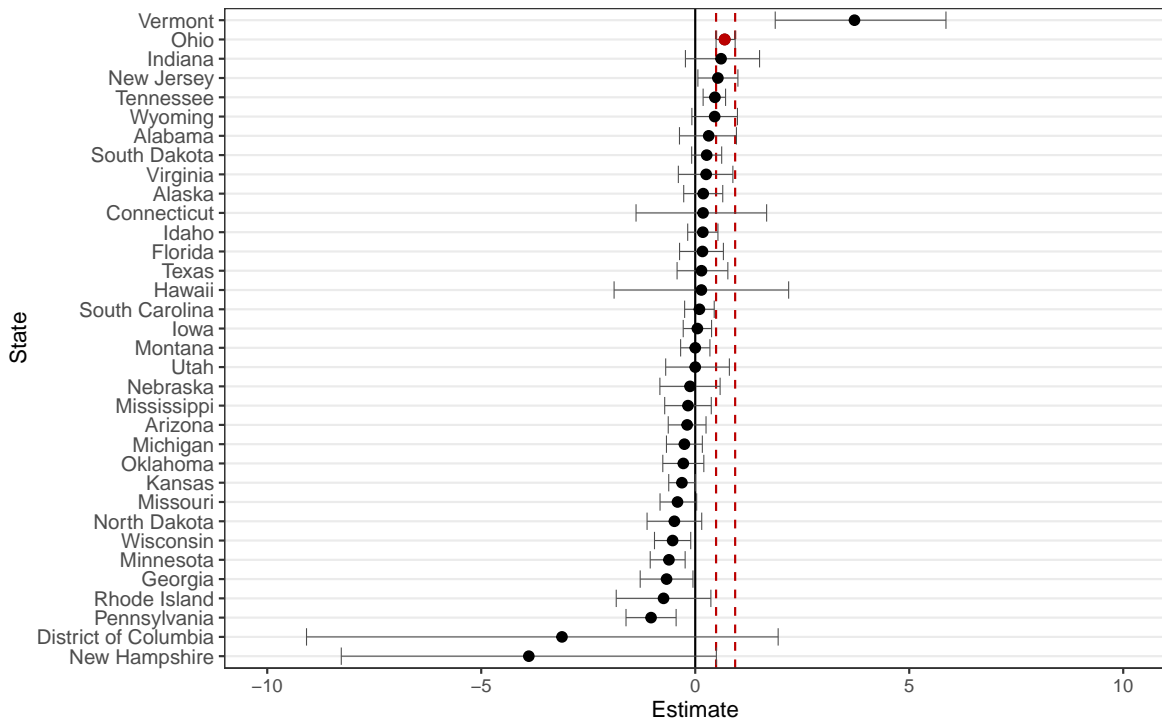

(a) Including the full donor pool

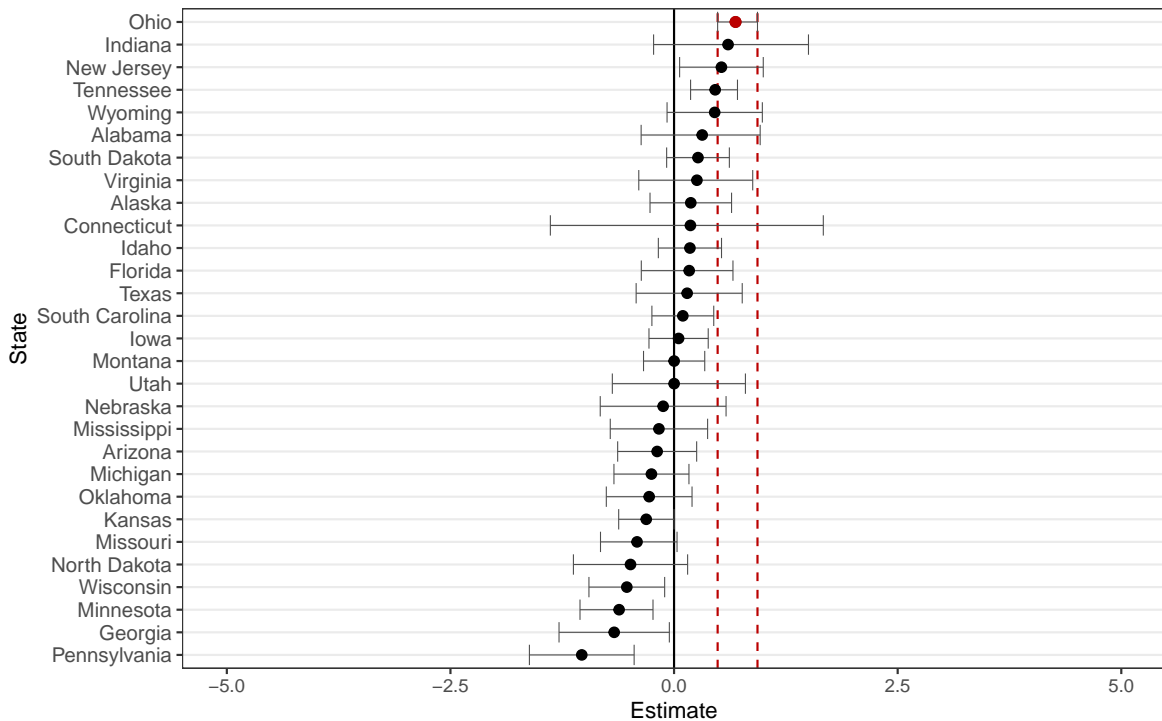

(b) Including states with pre-treatment RMSPE less than 10X that of Ohio

Notes: States not listed are not in the donor pool. The outcome is the share of population with any COVID-19 vaccination (at least a first dose) as of May 26, 2021. Pre-treatment RMSPE are computed using the full pre-treatment period in the data, starting on February 19, 2021 and ending on May 11, 2021. The grey error bars indicate the respective 95 percent confidence intervals, which are calculated using conformal inference.

Figure A7: Manufacturers' daily market shares of first dose vaccinations over time

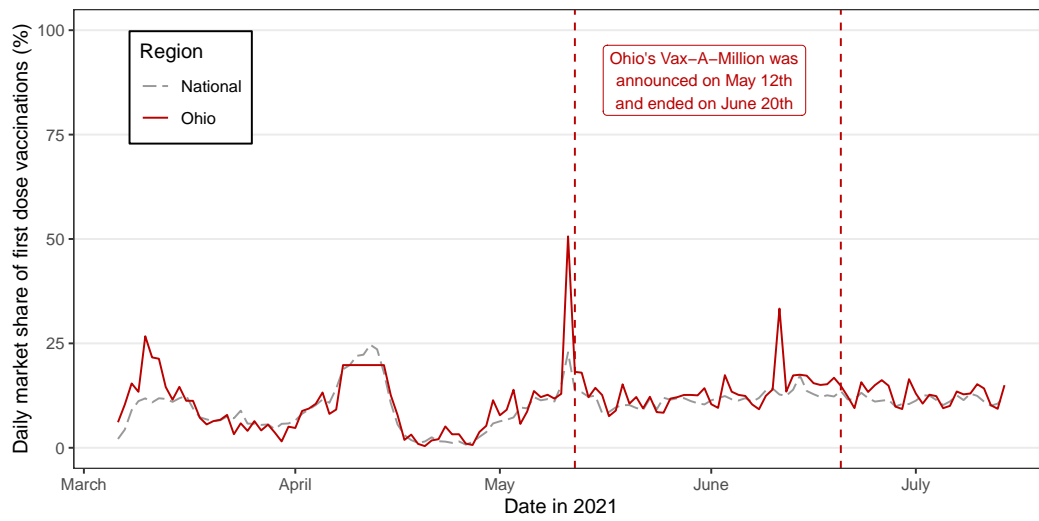

(a) Janssen

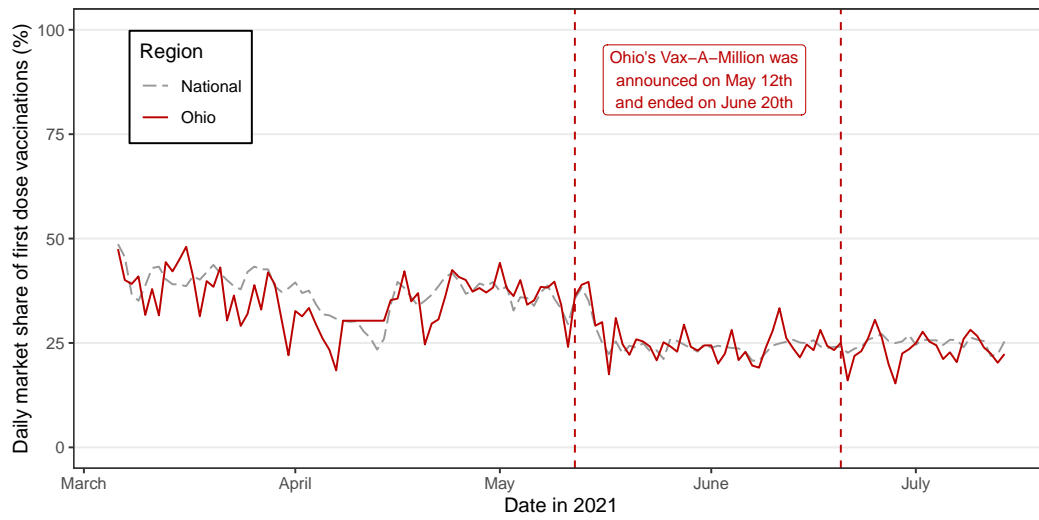

(b) Moderna

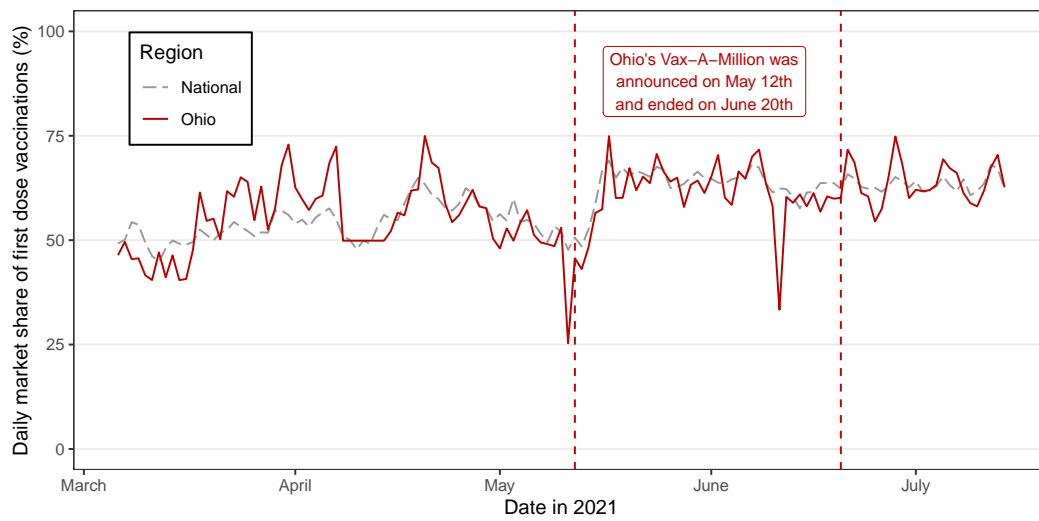

(c) Pfizer
